# Supplementary material for: Reversible chain transfer catalyzed polymerization in miniemulsion systems with tetraiodomethane as a catalyst
Source: Royal Society of Chemistry journal article supplement (doi:10.1039/d2py01019d), 2022-01-01
Supplement: d2py01019d1.pdf [file d2py01019d1.pdf]

## Supporting Information

# Reversible Chain Transfer Catalyzed Polymerization in Miniemulsion Systems with Tetraiodomethane as a Catalyst

*Yukiya Kitayama<sup>a,b\*</sup>, Masaya Sadakane<sup>a</sup> and Atsushi Harada<sup>a,b\*</sup>*

1. Department of Applied Chemistry, Graduate School of Engineering, Osaka Metropolitan University, 1-1, Gakuen-cho, Naka-ku, Sakai, Osaka 599-8531, Japan
2. Department of Applied Chemistry, Graduate School of Engineering, Osaka Prefecture University, 1-1, Gakuen-cho, Naka-ku, Sakai, Osaka 599-8531, Japan

## Contents

|                                                                                                                                |           |
|--------------------------------------------------------------------------------------------------------------------------------|-----------|
| <b>1. Pseudo first order plots of miniemulsion RTCP and miniemulsion ITP at 60°C .....</b>                                     | <b>3</b>  |
| <b>2. Size change of monomer droplets in miniemulsion RTCP with <math>Cl_4</math> .....</b>                                    | <b>4</b>  |
| <b>3. Size change of monomer droplets in reference miniemulsion polymerization without <math>Cl_4</math> .....</b>             | <b>5</b>  |
| <b>4. Polymerization control of miniemulsion RTCP with Brij98 at 80°C .....</b>                                                | <b>6</b>  |
| <b>5. Polymerization control of reference miniemulsion polymerization with Brij98 at 80°C .....</b>                            | <b>7</b>  |
| <b>6. Size distributions and SEM image of miniemulsion RTCP with Brij98 at 80°C .....</b>                                      | <b>8</b>  |
| <b>7. Size change of monomer droplets in miniemulsion RTCP at various temperatures .....</b>                                   | <b>9</b>  |
| <b>8. Pseudo first order plots of miniemulsion RTCP at 80°C .....</b>                                                          | <b>10</b> |
| <b>9. Particle size distributions of PMMA particles prepared by miniemulsion RTCP with different TTAB concentrations .....</b> | <b>11</b> |
| <b>10. Pseudo first order plots of miniemulsion RTCP with different TTAB concentrations .....</b>                              | <b>12</b> |
| <b>11. Pseudo first order plots of miniemulsion RTCP with different target DPs .....</b>                                       | <b>13</b> |
| <b>12. Particle size distributions of monomer-swollen PMMA particles prepared by miniemulsion RTCP. ....</b>                   | <b>14</b> |
| <b>13. Pseudo first order plots of miniemulsion RTCP of different monomers .....</b>                                           | <b>15</b> |

**1. Pseudo first order plots of miniemulsion RTCP and miniemulsion ITP at 60°C**

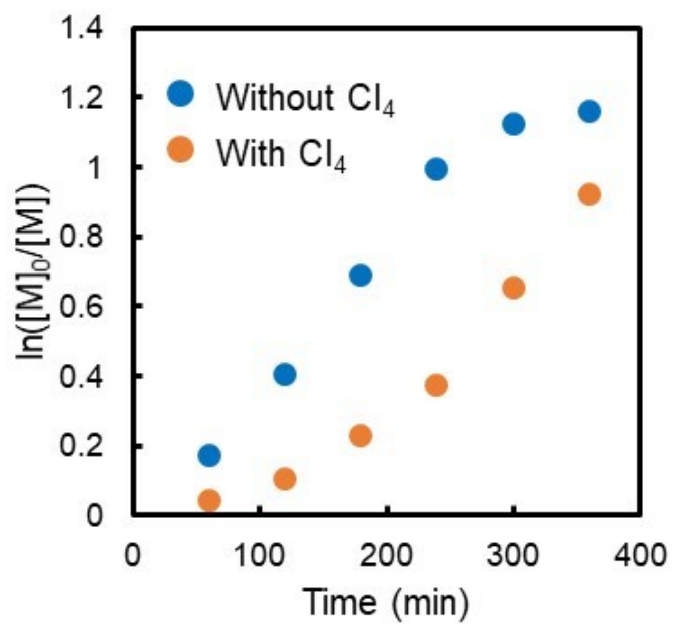

**Fig. S1.** (a) Pseudo first order plots of miniemulsion RTCP and reference miniemulsion polymerization without Cl<sub>4</sub>, Surfactant: Brij98, Temperature: 60 °C

## 2. Size change of monomer droplets in miniemulsion RTCP with $Cl_4$

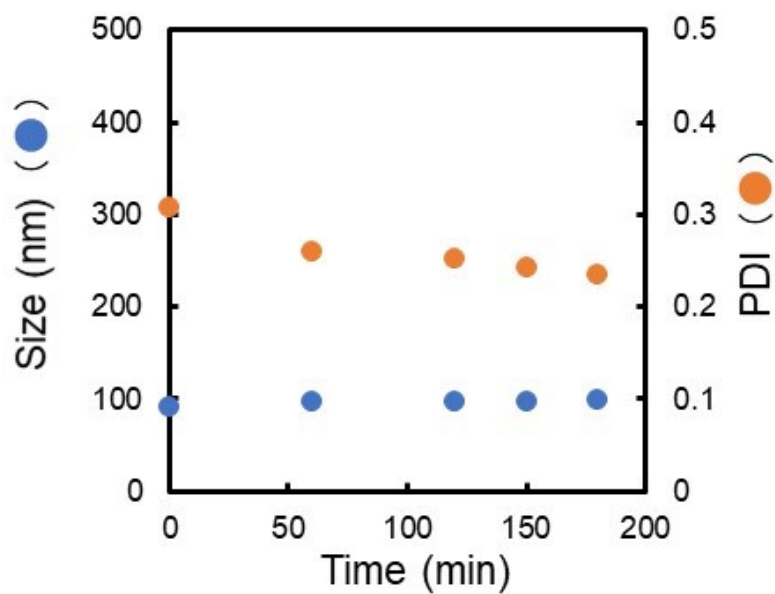

**Fig. S2.** Particle size and PDI of MMA droplets at various incubation times in miniemulsion RTCP system without initiator. Surfactant: Brij98, Temperature: 60 °C.

### 3. Size change of monomer droplets in reference miniemulsion polymerization without $Cl_4$

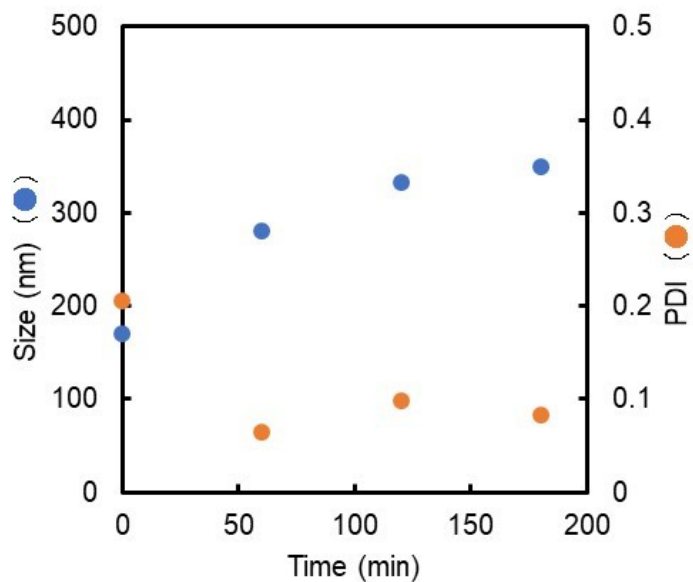

**Fig. S3.** Particle size and PDI of MMA droplets at various incubation times in reference miniemulsion polymerization system without initiator and catalyst. Surfactant: Brij98, Temperature: 60 °C.

#### 4. Polymerization control of miniemulsion RTCP with Brij98 at 80°C

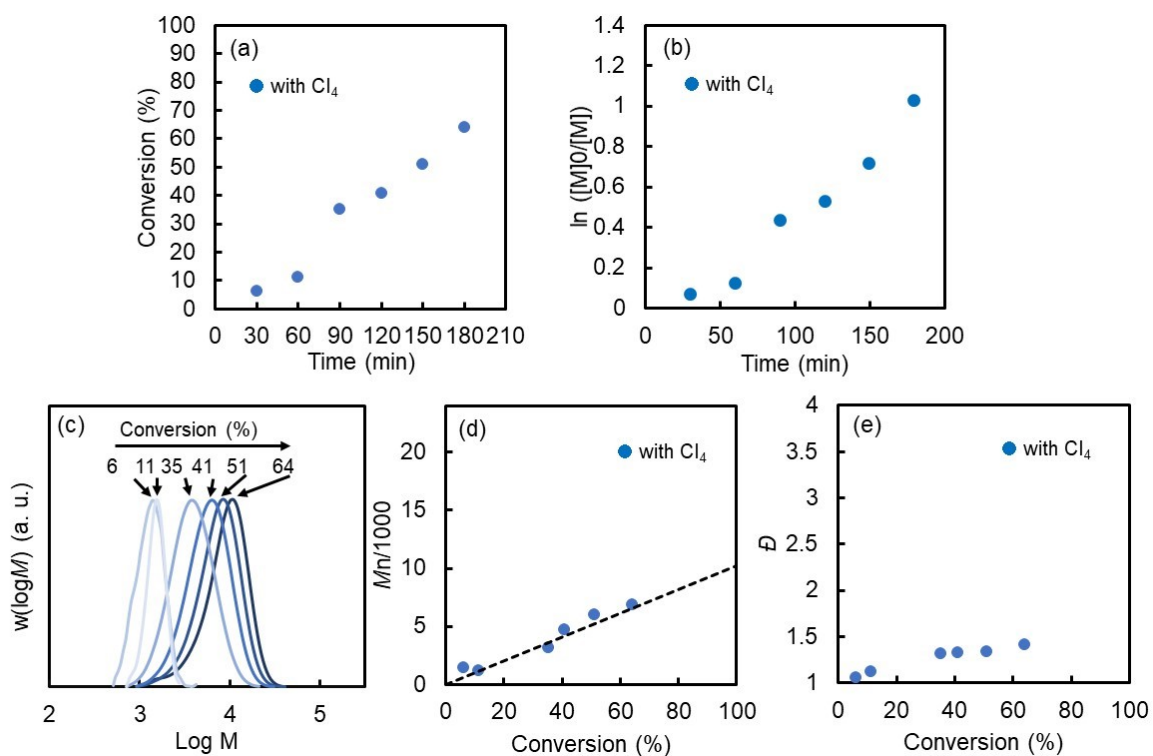

**Figure S4.** Time-conversion plot (a), pseudo first order plot (b), molecular weight distributions (c),  $M_n$  (d) and dispersity values (e) at various conversions for miniemulsion RTCP of MMA with  $\text{Cl}_4$  as a catalyst. The dashed line in (d) is theoretical number-averaged molecular weights. Surfactant: Brij98, Temperature: 80°C.

## 5. Polymerization control of reference miniemulsion polymerization with Brij98 at 80°C

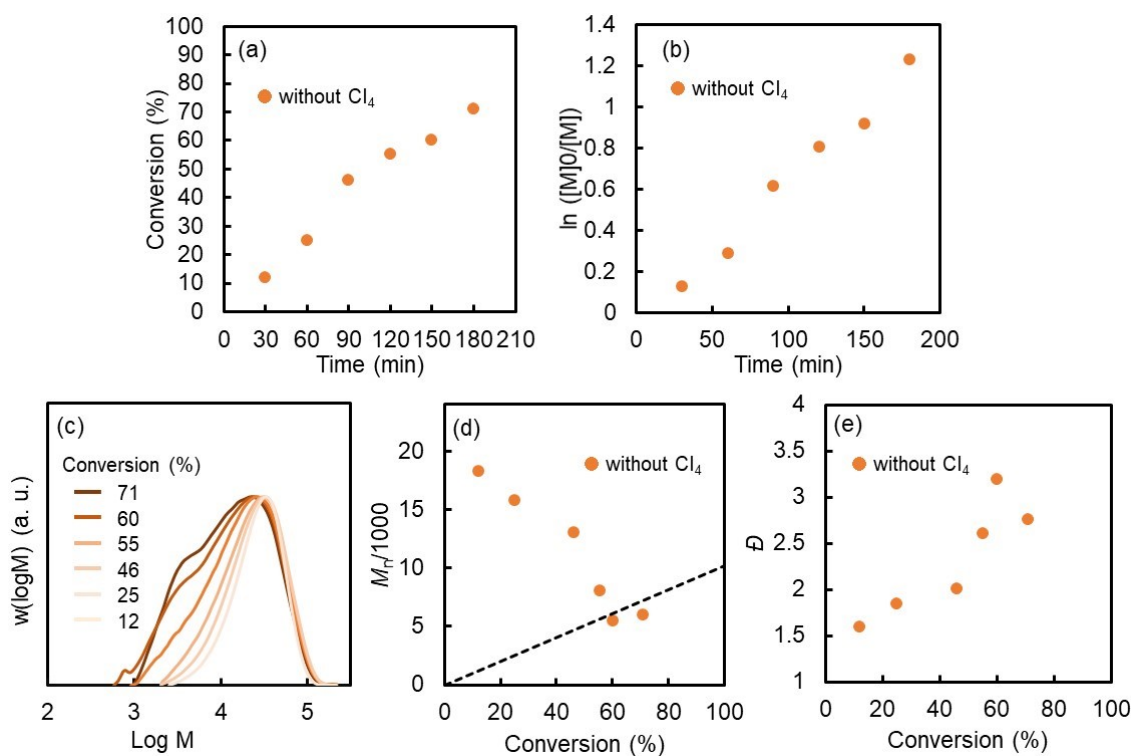

**Figure S5.** Time-conversion plot (a), pseudo first order plot (b), molecular weight distributions (c),  $M_n$  (d) and dispersity values (e) at various conversions for miniemulsion RTCP of MMA with  $\text{Cl}_4$  as a catalyst. The dashed line in (d) is theoretical number-averaged molecular weights. Surfactant: Brij98, Temperature: 80°C.

## 6. Size distributions and SEM image of miniemulsion RTCP with Brij98 at 80°C

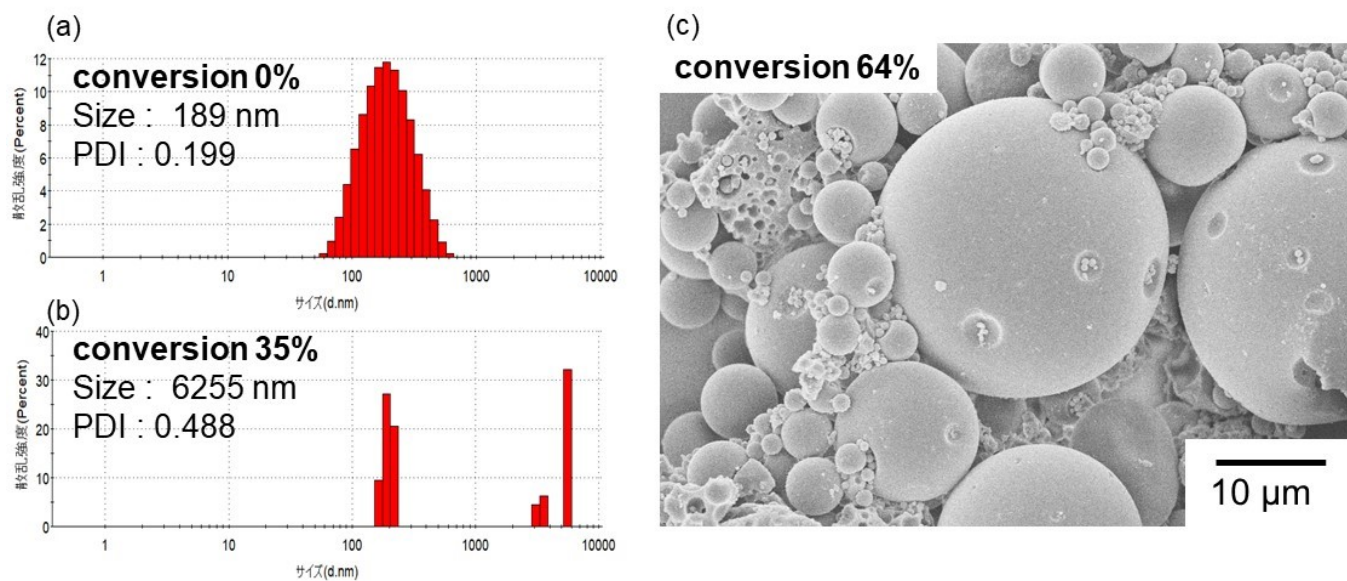

**Figure S6.** Particle size distributions [conversion: 0% (a), 35% (b)], and SEM image [conversion: 64% (c)] of PMMA particles of miniemulsion RTCP of MMA with  $\text{Cl}_4$  as a catalyst. Surfactant: Brij98, Temperature: 80°C.



## 7. Size change of monomer droplets in miniemulsion RTCP at various temperatures

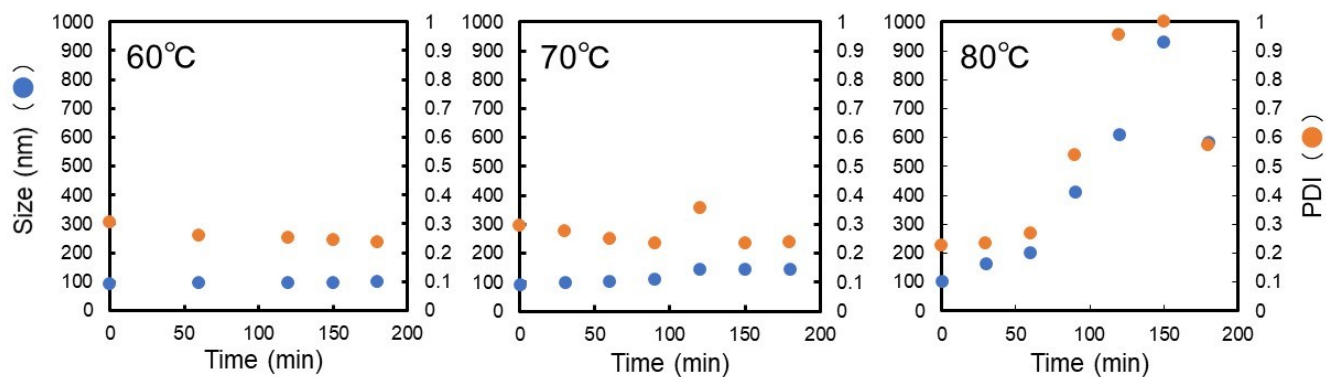

**Figure S7.** Sizes of MMA droplets containing chain transfer agents, catalyst, hydrophobe in Brij98 aqueous solution at various incubation times under different temperature. Temperature (°C): (a) 60°C, (b) 70°C, (c) 80°C

### 8. Pseudo first order plots of miniemulsion RTCP at 80°C

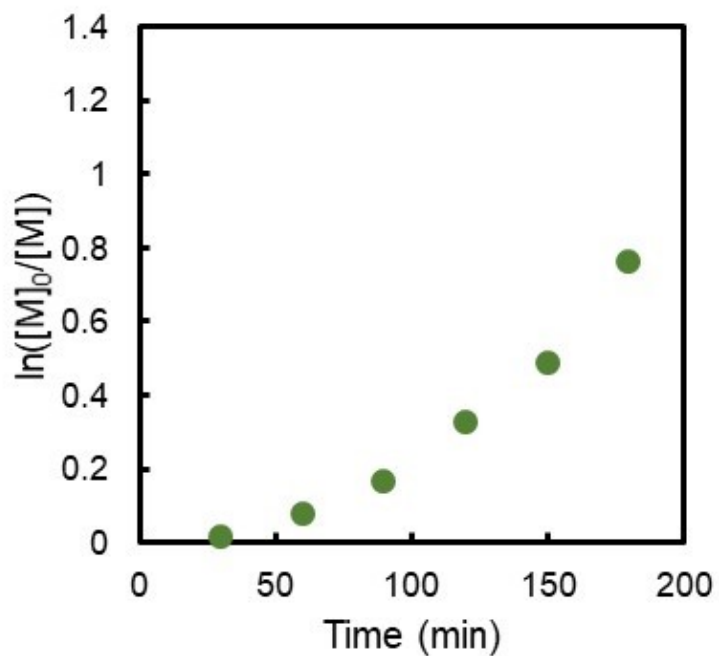

**Fig. S8.** Pseudo first order plot of miniemulsion RTCP conversions of MMA with  $\text{Cl}_4$  as the catalyst.

Surfactant: TTAB, Temperature: 80 °C.

**9. Particle size distributions of PMMA particles prepared by miniemulsion RTCP with different TTAB concentrations**

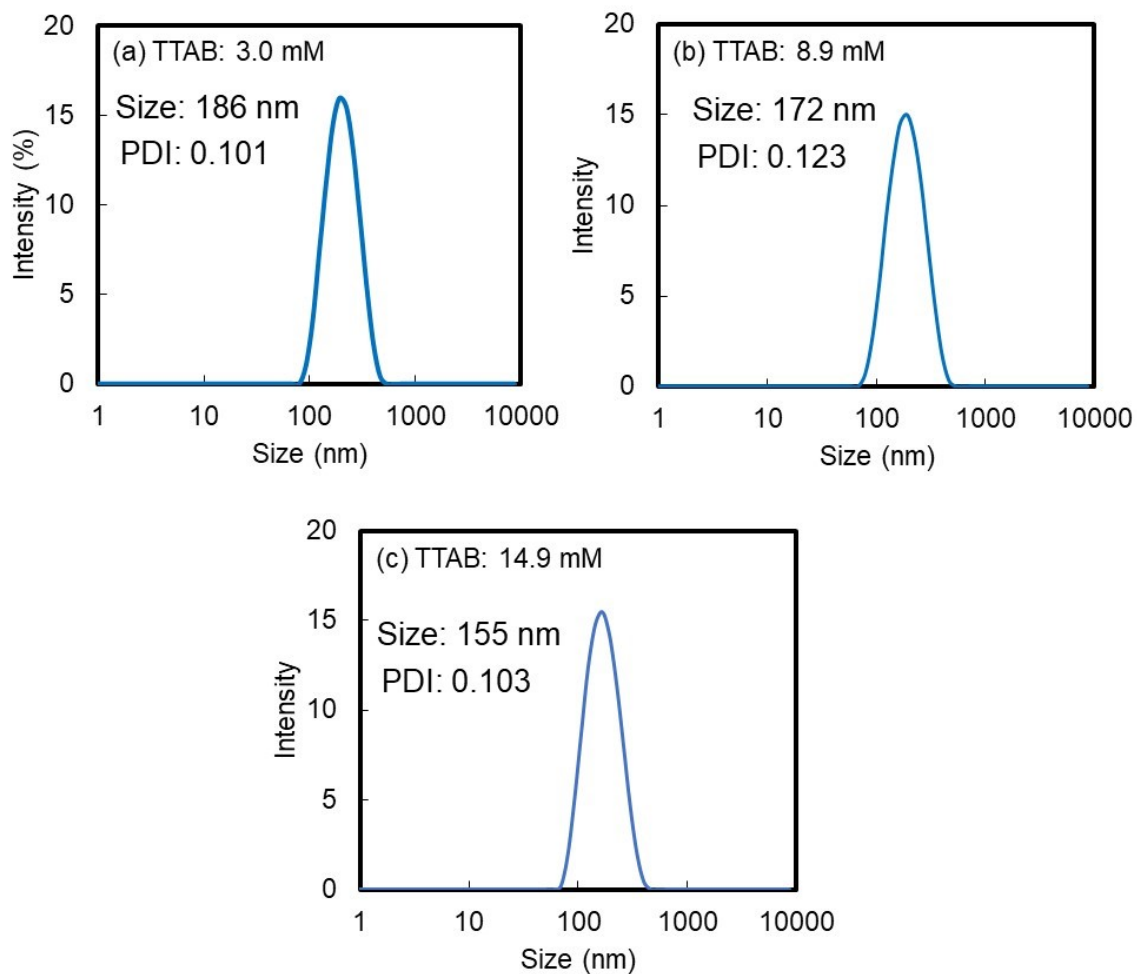

**Figure S9.** Particle size distributions of PMMA particles obtained by the miniemulsion RTCP with  $\text{Cl}_4$  as a catalyst in the presence of different TTAB concentrations. TTAB concentration; (a) 3.0 mM, (b) 8.9 mM, (c) 14.9 mM.

**10. Pseudo first order plots of miniemulsion RTCP with different TTAB concentrations**

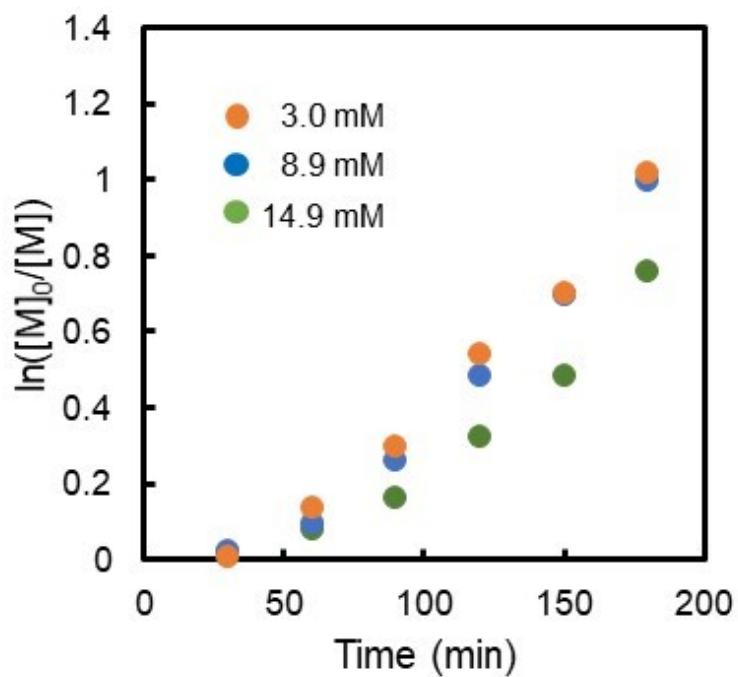

**Figure S10.** Pseudo first order plot of PMMA particles obtained by the miniemulsion RTCP with  $\text{Cl}_4$  as a catalyst in the presence of different TTAB concentrations. TTAB concentration; (a) 3.0 mM, (b) 8.9 mM, (c) 14.9 mM.

## 11. Pseudo first order plots of miniemulsion RTCP with different target DPs

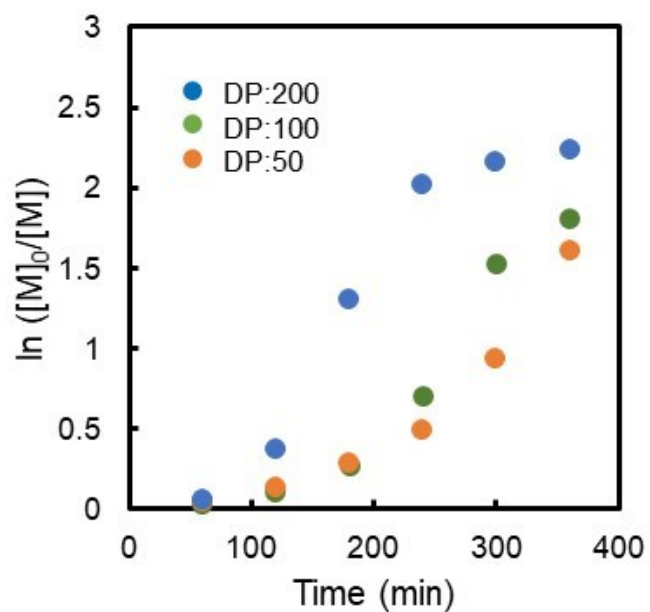

**Figure S11.** Pseudo first order plot of miniemulsion RTCP of MMA with  $\text{Cl}_4$  as the catalyst using different target DPs. Target DP: 200 in (d, g), 100 in (e, h), and 50 in (f, i). Surfactant: TTAB, Temperature: 60 °C.

**12. Particle size distributions of monomer-swollen PMMA particles prepared by miniemulsion RTCP.**

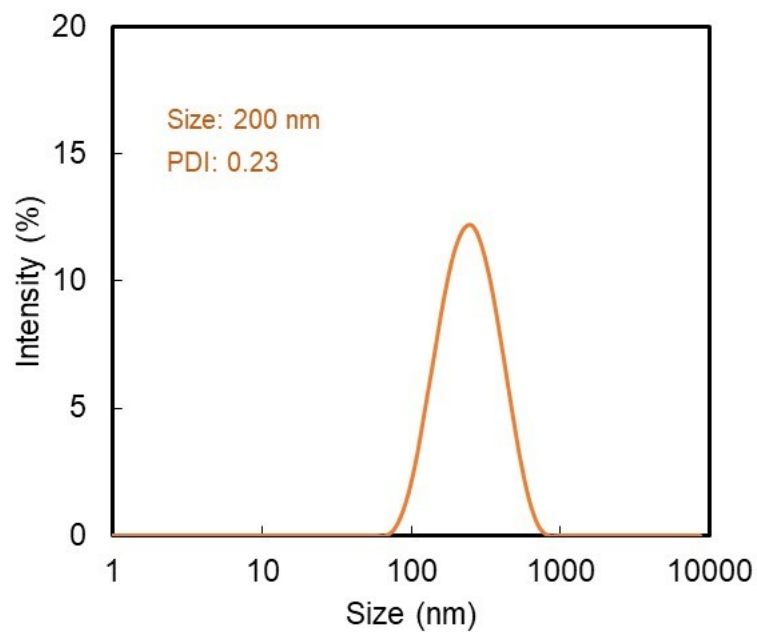

**Fig. S12.** Particle size distributions of monomer-swollen PMMA particles synthesized by the miniemulsion RTCPs for chain extension test.

### 13. Pseudo first order plots of miniemulsion RTCP of different monomers

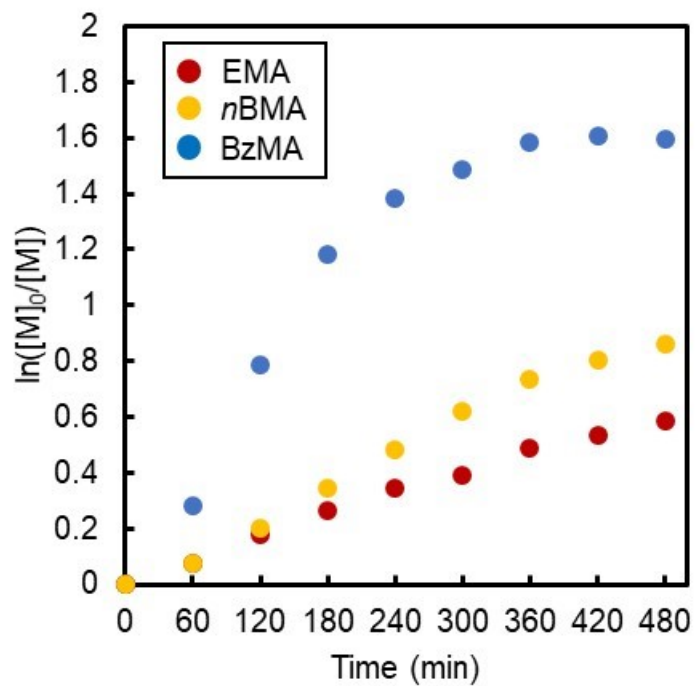

**Figure S13.** Pseudo first order plot of miniemulsion RTCP of EMA, *n*BMA, and BzMA with  $\text{Cl}_4$  as the catalyst. Surfactant: Brij98, Temperature: 60 °C.
